# Supplementary material
Source: PubMed Central journal article supplement (PMC4808760)
Supplement: 10.1194_D061432_jlr.D061432-4.pdf [file 10.1194_D061432_jlr.D061432-4.pdf]

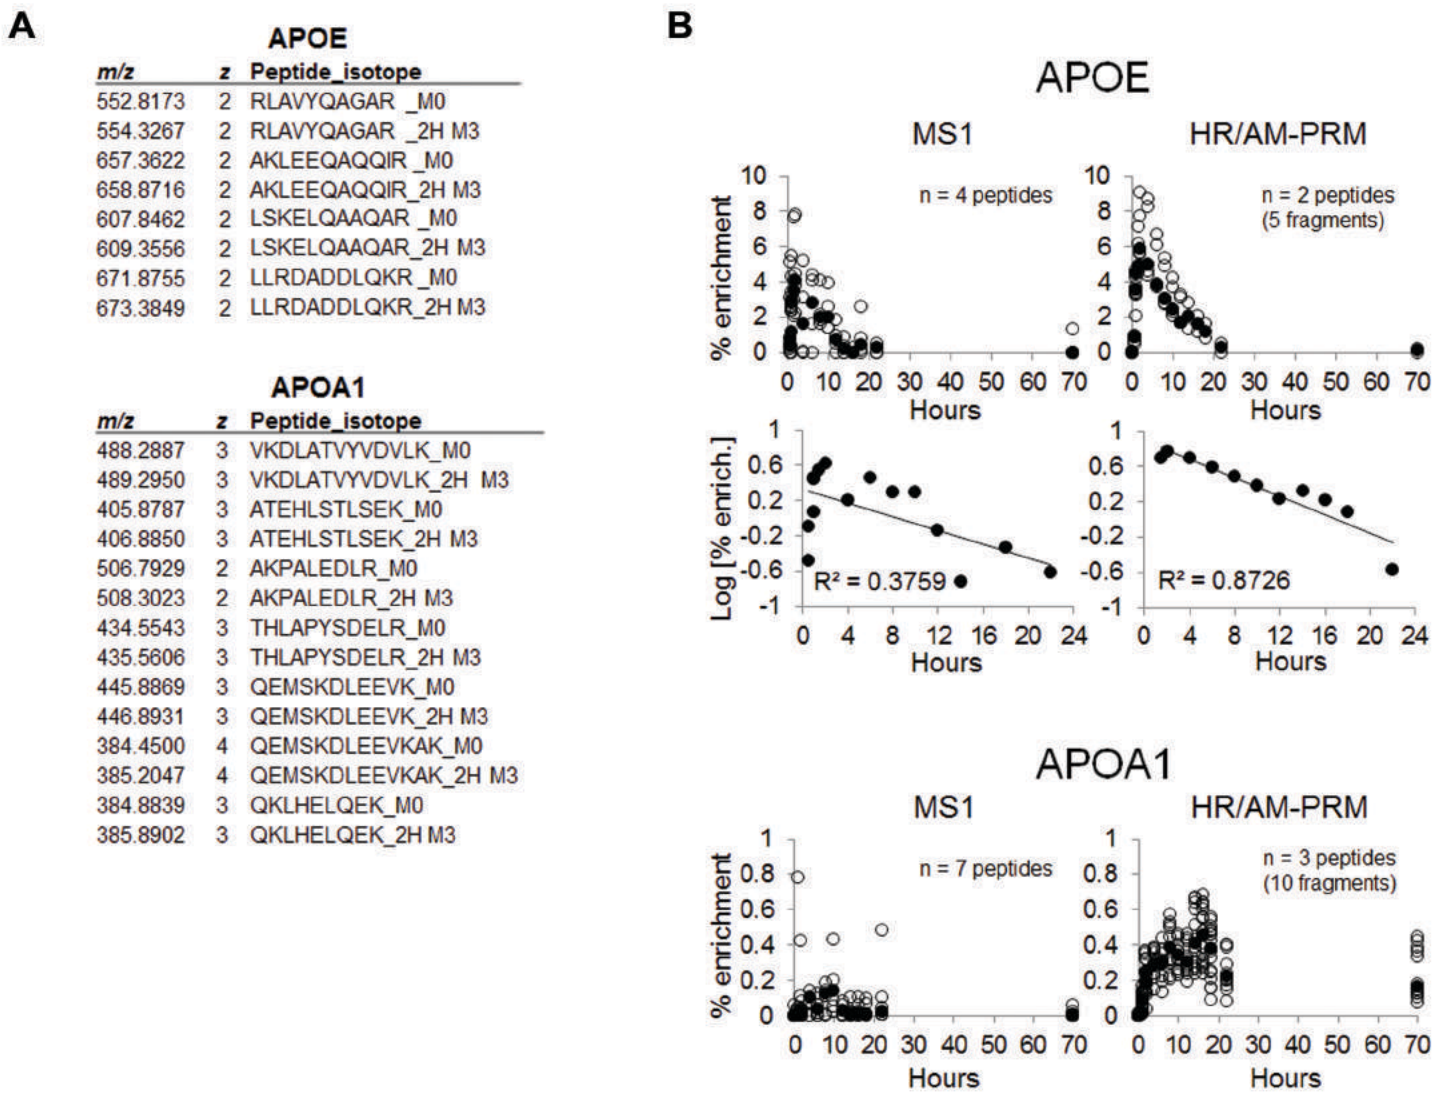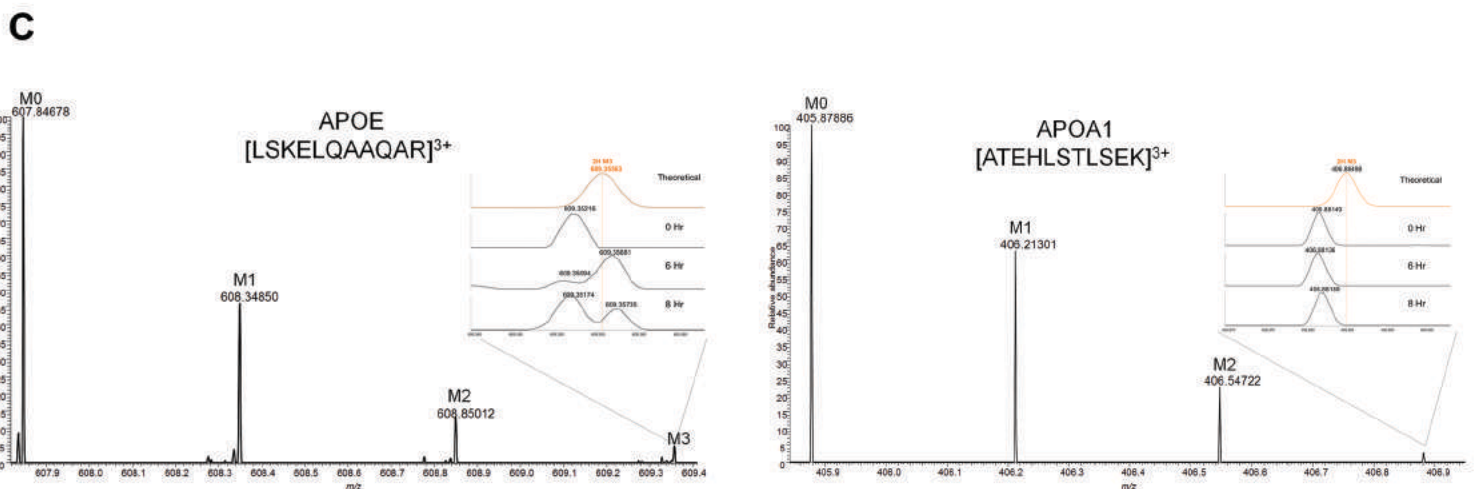

**Supplemental Figure 4. MS1-dependent D3-Leu tracer enrichment is not practical due to interference.**

(A) Peptides used for MS1-dependent 2H M3 enrichment. (B) Enrichment curves comparing (HR/AM) MS1 ( $R = 240K$  at  $400$  *m/z*, Orbitrap Elite) versus HR/AM-PRM ( $R = 140K$  at  $200$  *m/z*, Q Exactive). Open circles indicate individual peptide (MS1) or fragment ion (HR/AM-PRM) quantification values; closed circles indicate the median values. Peptides and fragment ions for HR/AM-PRM are provided in supplementary Table 2. (C) A closer look at the isotopes and M3 environment for two example peptides analyzed by MS1. The orange peak denotes the theoretical peak for the 2H M3 ion (calculated by XCalibur, Thermo Scientific). ApoE peptide - the peaks used for enrichment quantification lay to the right of the dashed orange line. ApoA-I peptide - no signal is detected for the theoretical 2H M3 ion.
