# Supplementary material
Source: PubMed Central journal article supplement (PMC4808760)
Supplement: 10.1194_D061432_jlr.D061432-5.pdf [file 10.1194_D061432_jlr.D061432-5.pdf]

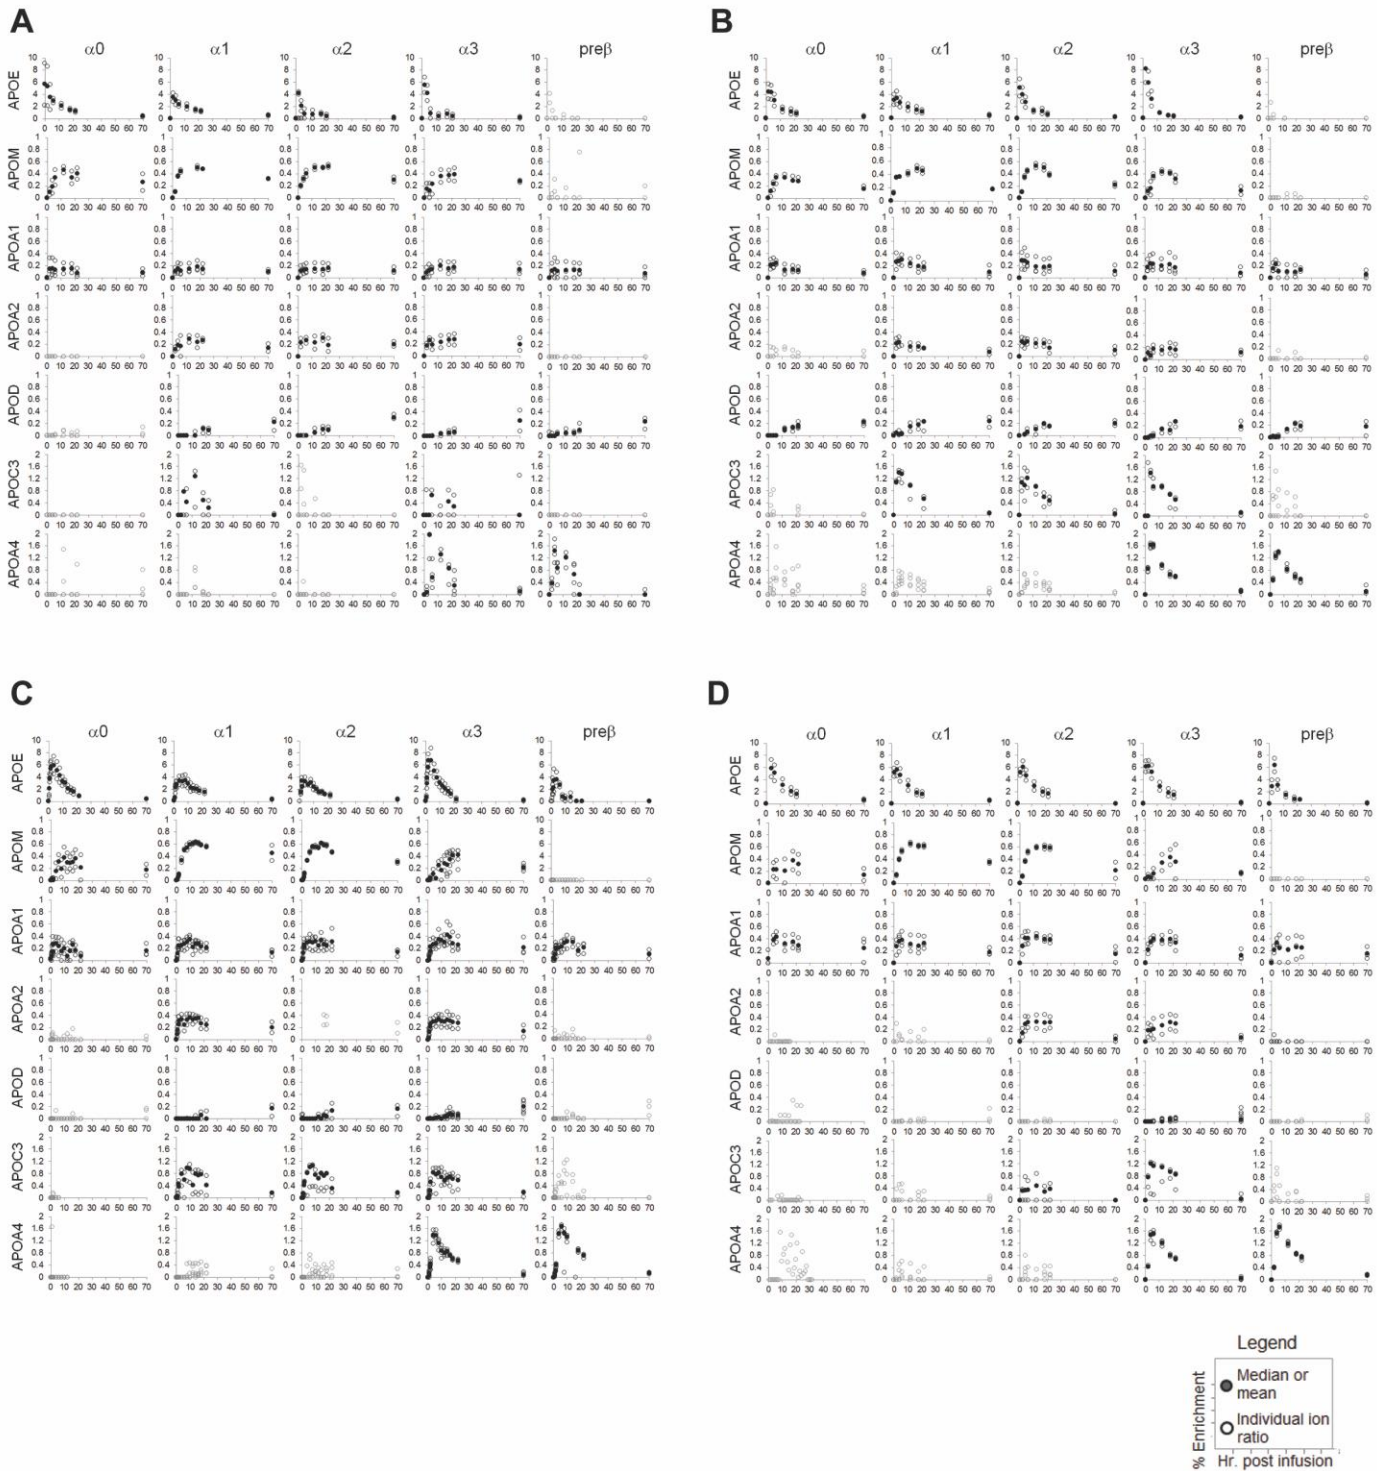

**Supplementary Figure 5. HDL apolipoprotein enrichment curves.** D3-Leu enrichment curve data for participants 250 (A), 225 (B), 243 (C) and 243 with apoB depletion (D). The median for the individual fragment isotope enrichment ratios was calculated for all apolipoproteins, including apoA-I, however the apoA-I closed circle is the mean of the three peptide median ratios (supplemental Table 2). Although a complete panel is presented, enrichment could not be measured in all samples (Materials and Methods). Enrichment curves were not discernible in panels containing only open/grey circles.
