# Supplementary material
Source: PubMed Central journal article supplement (PMC4808760)
Supplement: 10.1194_D061432_jlr.D061432-6.pdf [file 10.1194_D061432_jlr.D061432-6.pdf]

A

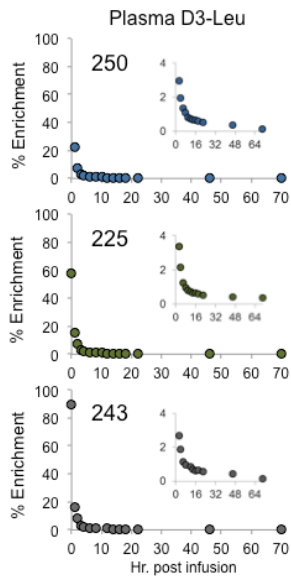

B

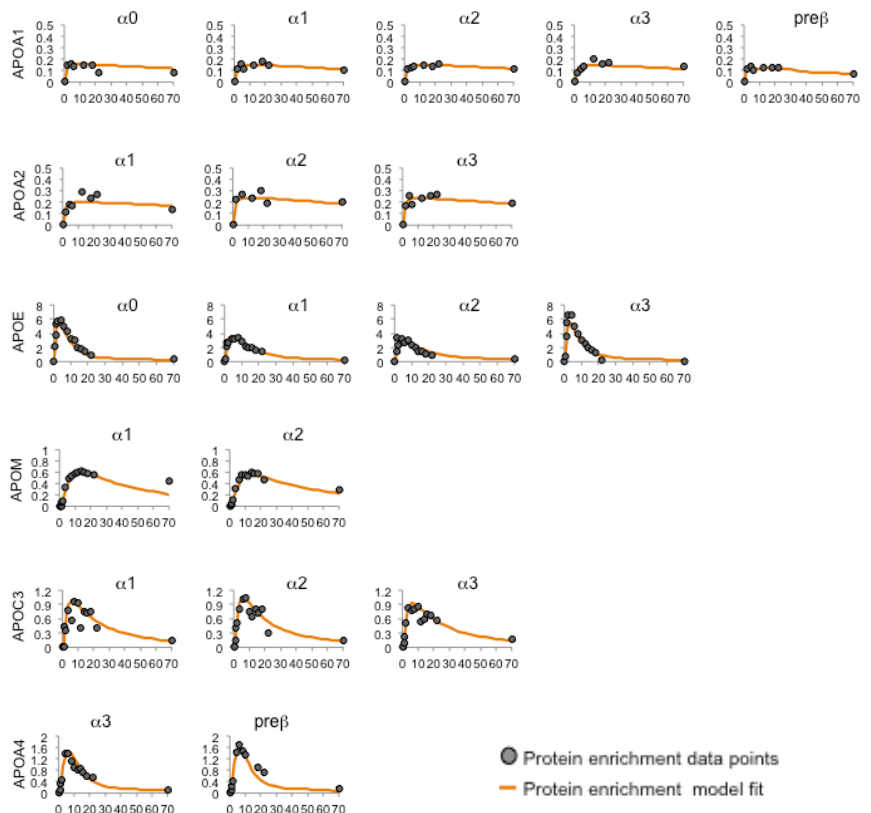

C

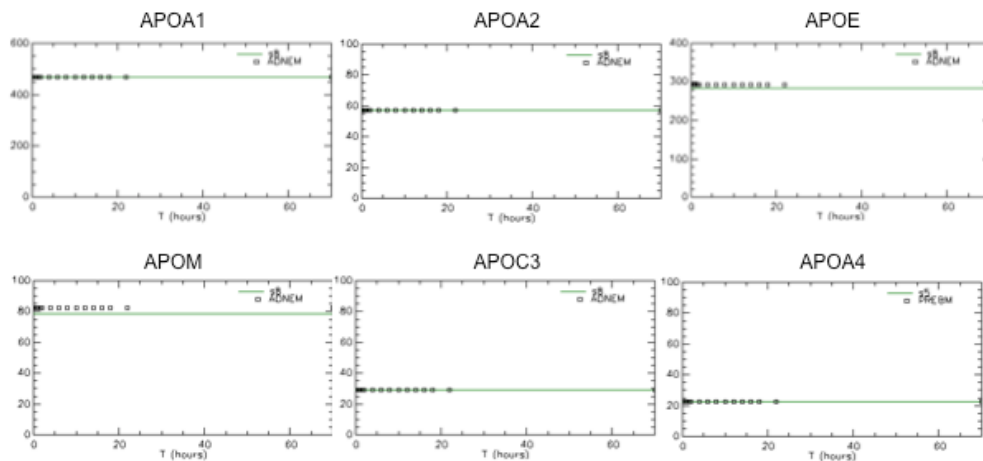

**Supplementary Figure 6. Kinetic analysis describing the *in vivo* metabolism of HDL apolipoproteins on each HDL size.** (A) D3-Leu tracer enrichment in plasma. These enrichment curves were used in each model to describe the behavior of the amino acid precursor pool (D3-Leu tracer enrichment in plasma) that was expressed as a forcing function. The same D3-Leu tracer enrichment curve was used for all apolipoprotein models per participant. Inset: zoom of the lower portion of the curve highlighting the exponential decay. (B) SAAM II enrichment curve fits for each protein across the HDL size fractions. Representative plots for apoE, apoM, apoC-III and apoA-IV were generated using participant 243 model fits. Due to the lack of enrichment data for apoA-II alpha2 for participant 243, the apoA-I and apoA2 enrichment plots for participant 250 are shown. (C) SAAM II pool size fits for each protein. Plots were generated using participant 243 alpha1 (apoA-I, apoA-II, apoE, apoM, apoC-III) and prebeta (apoA-IV) data.
