# Supplementary material
Source: PubMed Central journal article supplement (PMC4808760)
Supplement: 10.1194_D061432_jlr.D061432-7.pdf [file 10.1194_D061432_jlr.D061432-7.pdf]

| <b>Participant ID#</b> | <b>Gender</b> | <b>Age</b> | <b>Race</b> | <b>Height (m)</b> | <b>Weight (kg)</b> | <b>IBW (kg)</b> | <b>BMI (kg/m<sup>2</sup>)</b> | <b>Plas. Vol. (dL)</b> | <b>Total-C (mg/dL)</b> | <b>TG (mg/dL)</b> | <b>LDL-C (mg/dL)</b> | <b>HDL-C (mg/dL)</b> | <b>ApoA1 (mg/dL)</b> |
|------------------------|---------------|------------|-------------|-------------------|--------------------|-----------------|-------------------------------|------------------------|------------------------|-------------------|----------------------|----------------------|----------------------|
| <b>250</b>             | Female        | 25         | White       | 1.69              | 73.2               | 71.4            | 25.6                          | 31.6                   | 132                    | 54                | 73                   | 48                   | 155.8                |
| <b>225</b>             | Female        | 33         | Black       | 1.70              | 89.0               | 72.5            | 30.7                          | 33.5                   | 142                    | 50                | 95                   | 37                   | 105.2                |
| <b>243</b>             | Male          | 49         | White       | 1.73              | 91.0               | 74.6            | 30.5                          | 34.5                   | 158                    | 262               | 82                   | 24                   | 105.5                |

Supplementary Table 1. Clinical data. IBW, ideal body weight; BMI, body mass index; Plas. Vol., plasma volume
