# Supplementary material
Source: PubMed Central journal article supplement (PMC4808760)
Supplement: 10.1194_D061432_jlr.D061432-8.pdf [file 10.1194_D061432_jlr.D061432-8.pdf]

| Sequence (APOA1) | <i>m/z</i> | Label | <i>z</i> | Ion type  | SAAMII modeling |
|------------------|------------|-------|----------|-----------|-----------------|
| ATEHLSTLSEK      | 405.8787   | light | 3        | precursor | yes             |
| ATEHLSTLSEK      | 407.8913   | heavy | 3        | precursor |                 |
| LSEK             | 476.2715   | light | 1        | y4        |                 |
| LSEK             | 479.2903   | heavy | 1        | y4        |                 |
| TLSEK            | 577.3192   | light | 1        | y5        |                 |
| TLSEK            | 580.3380   | heavy | 1        | y5        |                 |
| THLAPYSDEL R     | 434.5543   | light | 3        | precursor | yes             |
| THLAPYSDEL R     | 436.5669   | heavy | 3        | precursor |                 |
| THL              | 352.1979   | light | 1        | b3        |                 |
| THL              | 355.2168   | heavy | 1        | b3        |                 |
| ELR              | 417.2456   | light | 1        | y3        |                 |
| ELR              | 420.2644   | heavy | 1        | y3        |                 |
| THLA             | 423.2350   | light | 1        | b4        |                 |
| THLA             | 426.2539   | heavy | 1        | b4        |                 |
| THLAP            | 520.2878   | light | 1        | b5        |                 |
| THLAP            | 523.3066   | heavy | 1        | b5        |                 |
| DEL R            | 532.2726   | light | 1        | y4        |                 |
| DEL R            | 535.2914   | heavy | 1        | y4        |                 |
| VKDLATVYVDVLK    | 488.2887   | light | 3        | precursor | yes             |
| VKDLATVYVDVLK    | 490.3013   | heavy | 3        | precursor |                 |
| VLK              | 359.2653   | light | 1        | y3        |                 |
| VLK              | 362.2841   | heavy | 1        | y3        |                 |
| VLK              | 474.2922   | light | 1        | y4        |                 |
| VLK              | 477.3111   | heavy | 1        | y4        |                 |
| DVLK             | 573.3606   | light | 1        | y5        |                 |
| DVLK             | 576.3797   | heavy | 1        | y5        |                 |
| Sequence (APOA2) | <i>m/z</i> | Label | <i>z</i> | Ion type  |                 |
| EQLTPLIK         | 471.2900   | light | 2        | precursor |                 |
| EQLTPLIK         | 474.3057   | heavy | 2        | precursor |                 |
| LIK              | 373.2809   | light | 1        | y3        |                 |
| LIK              | 376.2998   | heavy | 1        | y3        |                 |
| PLIK             | 470.3337   | light | 1        | y4        |                 |
| PLIK             | 473.3525   | heavy | 1        | y4        |                 |
| TPLIK            | 571.3814   | light | 1        | y5        |                 |
| TPLIK            | 574.4002   | heavy | 1        | y5        |                 |
| SKEQLTPLIK       | 578.8504   | light | 2        | precursor | yes             |

| SKEQLTPLIK       | 581.8693   | heavy | 2        | precursor |     |
|------------------|------------|-------|----------|-----------|-----|
| PLIK             | 470.3337   | light | 1        | y4        |     |
| PLIK             | 473.3525   | heavy | 1        | y4        |     |
| TPLIK            | 571.3814   | light | 1        | y5        |     |
| TPLIK            | 574.4002   | heavy | 1        | y5        |     |
| Sequence (APOA4) | <i>m/z</i> | Label | <i>z</i> | Ion type  |     |
| ALVQQMEQLR       | 608.3293   | light | 2        | precursor | yes |
| ALVQQMEQLR       | 611.3482   | heavy | 2        | precursor |     |
| AL               | 185.1285   | light | 1        | b2        |     |
| AL               | 188.1473   | heavy | 1        | b2        |     |
| ALV              | 284.1969   | light | 1        | b3        |     |
| ALV              | 287.2157   | heavy | 1        | b3        |     |
| QLR              | 416.2616   | light | 1        | y3        |     |
| QLR              | 419.2804   | heavy | 1        | y3        |     |
| EQLR             | 545.3042   | light | 1        | y4        |     |
| EQLR             | 548.3230   | heavy | 1        | y4        |     |
| LGEVNTYAGDLQK    | 704.3594   | light | 2        | precursor |     |
| LGEVNTYAGDLQK    | 707.3782   | heavy | 2        | precursor |     |
| LGE              | 300.1554   | light | 1        | b3        |     |
| LGE              | 303.1742   | heavy | 1        | b3        |     |
| LQK              | 388.2554   | light | 1        | y3        |     |
| LQK              | 391.2743   | heavy | 1        | y3        |     |
| LGEVN            | 513.2667   | light | 1        | b5        |     |
| LGEVN            | 516.2856   | heavy | 1        | b5        |     |
| GDLQK            | 560.3039   | light | 1        | y5        |     |
| GDLQK            | 563.3227   | heavy | 1        | y5        |     |
| AGDLQK           | 631.3410   | light | 1        | y6        |     |
| AGDLQK           | 634.3598   | heavy | 1        | y6        |     |
| TQVNTQAEQLR      | 644.3362   | light | 2        | precursor |     |
| TQVNTQAEQLR      | 645.8456   | heavy | 2        | precursor |     |
| QLR              | 416.2616   | light | 1        | y3        |     |
| QLR              | 419.2804   | heavy | 1        | y3        |     |
| EQLR             | 545.3042   | light | 1        | y4        |     |
| EQLR             | 548.3230   | heavy | 1        | y4        |     |

| Sequence (APOC3) | <i>m/z</i> | Label | <i>z</i> | Ion type  |     |
|------------------|------------|-------|----------|-----------|-----|
| DALSSVQESQVAQQAR | 858.9292   | light | 2        | precursor | yes |
| DALSSVQESQVAQQAR | 860.4386   | heavy | 2        | precursor |     |
| DAL              | 300.1554   | light | 1        | b3        |     |
| DAL              | 303.1742   | heavy | 1        | b3        |     |
| DALS             | 387.1874   | light | 1        | b4        |     |
| DALS             | 390.2063   | heavy | 1        | b4        |     |
| DALSS            | 474.2195   | light | 1        | b5        |     |
| DALSS            | 477.2383   | heavy | 1        | b5        |     |
| GWVTDGFSSLK      | 598.8009   | light |          | precursor |     |
| GWVTDGFSSLK      | 600.3104   | heavy |          | precursor |     |
| SLK              | 347.2289   | light | 1        | y3        |     |
| SLK              | 350.2477   | heavy | 1        | y3        |     |
| SSLK             | 434.2609   | light | 1        | y4        |     |
| SSLK             | 437.2798   | heavy | 1        | y4        |     |
| FSSLK            | 581.3293   | light | 1        | y5        |     |
| FSSLK            | 584.3482   | heavy | 1        | y5        |     |
| Sequence (APOD)  | <i>m/z</i> | Label | <i>z</i> | Ion type  |     |
| VLNQELR          | 436.2534   | light | 2        | precursor | yes |
| VLNQELR          | 439.2723   | heavy | 2        | precursor |     |
| ELR              | 417.2456   | light | 1        | y3        |     |
| ELR              | 420.2644   | heavy | 1        | y3        |     |
| QELR             | 545.3042   | light | 1        | y4        |     |
| QELR             | 548.3230   | heavy | 1        | y4        |     |
| NQELR            | 659.3471   | light | 1        | y5        |     |
| NQELR            | 662.3659   | heavy | 1        | y5        |     |
| Sequence (APOE)  | <i>m/z</i> | Label | <i>z</i> | Ion type  |     |
| LGPLVEQGR        | 484.7798   | light | 2        | precursor | yes |
| LGPLVEQGR        | 487.7986   | heavy | 2        | precursor |     |
| LGP              | 268.1656   | light | 1        | b3        |     |
| LGP              | 271.1844   | heavy | 1        | b3        |     |
| LGPL             | 381.2496   | light | 1        | b4        |     |
| LGPL             | 384.2685   | heavy | 1        | b4        |     |
| AKLEEQAQQIR      | 657.3622   | light | 2        | precursor |     |
| AKLEEQAQQIR      | 658.8716   | heavy | 2        | precursor |     |
| AKL              | 313.2234   | light | 1        | b3        |     |
| AKL              | 316.2422   | heavy | 1        | b3        |     |

| AKLE            | 442.2660   | light | 1        | b4            |
|-----------------|------------|-------|----------|---------------|
| AKLE            | 445.2848   | heavy | 1        | b4            |
| AKLEE           | 571.3086   | light | 1        | b5            |
| AKLEE           | 574.3274   | heavy | 1        | b5            |
| WELALGR         | 484.7798   | light | 2        | precursor     |
| WELALGR         | 487.7986   | heavy | 2        | precursor     |
| LGR             | 345.2245   | light | 1        | y3            |
| LGR             | 348.2433   | heavy | 1        | y3            |
| ALGR            | 416.2616   | light | 1        | y4            |
| ALGR            | 419.2804   | heavy | 1        | y4            |
| LALGR           | 529.3457   | light | 1        | y5            |
| LALGR           | 532.3645   | heavy | 1        | y5            |
| Sequence (APOM) | <i>m/z</i> | Label | <i>z</i> | Ion type      |
| AFLTPR          | 409.2502   | light | 2        | precursor     |
| AFLTPR          | 412.2690   | heavy | 2        | precursor     |
| AFL             | 332.1969   | light | 1        | b3            |
| AFL             | 335.2157   | heavy | 1        | b3            |
| LTPR            | 486.3035   | light | 1        | y4            |
| LTPR            | 489.3223   | heavy | 1        | y4            |
| LLTPR           | 599.3875   | light | 1        | y5            |
| LLTPR           | 602.4064   | heavy | 1        | y5            |
| FLLYNR          | 413.2345   | light | 2        | precursor yes |
| FLLYNR          | 416.2533   | heavy | 2        | precursor     |
| FL              | 261.1598   | light | 1        | b2            |
| FL              | 264.1786   | heavy | 1        | b2            |
| LYNR            | 565.3093   | light | 1        | y4            |
| LYNR            | 568.3281   | heavy | 1        | y4            |

---

**Supplementary Table 2.** Apolipoprotein peptides and their corresponding fragment ions used for HR/AM-PRM.
