# Supplementary material
Source: PubMed Central journal article supplement (PMC4808760)
Supplement: 10.1194_D061432_jlr.D061432-9.pdf [file 10.1194_D061432_jlr.D061432-9.pdf]

**A****250**

|              | <i>HDL Size</i> | <i>FCR (pools/day)</i> | <i>PR (mg/kg/day)</i> | <i>PS (mg)</i> |
|--------------|-----------------|------------------------|-----------------------|----------------|
| <b>APOE</b>  | $\alpha 0$      | 2.06                   | 4.27                  | 151.65         |
|              | $\alpha 1$      | 1.56                   | 6.12                  | 287.10         |
|              | $\alpha 2$      | 2.64                   | 3.04                  | 84.43          |
|              | $\alpha 3$      | 4.87                   | 3.26                  | 49.01          |
| <b>APOM</b>  | $\alpha 1$      | 0.33                   | 0.79                  | 173.81         |
|              | $\alpha 2$      | 0.34                   | 0.14                  | 29.65          |
| <b>APOA1</b> | $\alpha 0$      | 0.22                   | 0.09                  | 30.02          |
|              | $\alpha 1$      | 0.25                   | 3.23                  | 938.07         |
|              | $\alpha 2$      | 0.21                   | 6.16                  | 2166.03        |
|              | $\alpha 3$      | 0.20                   | 4.85                  | 1748.83        |
|              | pre $\beta$     | 5.78                   | 0.57                  | 7.27           |
| <b>APOA2</b> | $\alpha 1$      | 0.17                   | 0.21                  | 87.54          |
|              | $\alpha 2$      | 0.26                   | 1.54                  | 428.26         |
|              | $\alpha 3$      | 0.21                   | 0.61                  | 218.52         |
| <b>APOC3</b> | $\alpha 1$      | 1.54                   | 0.92                  | 43.66          |
|              | $\alpha 2$      | -                      | -                     | -              |
|              | $\alpha 3$      | 1.58                   | 1.13                  | 52.27          |
| <b>APOA4</b> | $\alpha 3$      | 2.86                   | 0.12                  | 2.95           |
|              | pre $\beta$     | 1.96                   | 1.13                  | 42.10          |

**B****225**

|              | <i>HDL Size</i> | <i>FCR (pools/day)</i> | <i>PR (mg/kg/day)</i> | <i>PS (mg)</i> |
|--------------|-----------------|------------------------|-----------------------|----------------|
| <b>APOE</b>  | $\alpha 0$      | 6.00                   | 3.93                  | 58.32          |
|              | $\alpha 1$      | 2.50                   | 6.78                  | 241.80         |
|              | $\alpha 2$      | 6.26                   | 11.38                 | 161.78         |
|              | $\alpha 3$      | 12.74                  | 8.82                  | 61.57          |
| <b>APOM</b>  | $\alpha 1$      | 0.94                   | 0.73                  | 68.77          |
|              | $\alpha 2$      | 0.95                   | 0.45                  | 42.59          |
| <b>APOA1</b> | $\alpha 0$      | 0.77                   | 0.04                  | 5.07           |
|              | $\alpha 1$      | 0.90                   | 6.12                  | 606.37         |
|              | $\alpha 2$      | 1.24                   | 24.02                 | 1727.28        |
|              | $\alpha 3$      | 0.69                   | 9.04                  | 1164.12        |
|              | pre $\beta$     | 5.55                   | 0.78                  | 12.55          |
| <b>APOA2</b> | $\alpha 1$      | 0.66                   | 0.44                  | 58.78          |
|              | $\alpha 2$      | 1.13                   | 3.70                  | 290.77         |
|              | $\alpha 3$      | 0.52                   | 0.99                  | 170.85         |
| <b>APOC3</b> | $\alpha 1$      | 2.16                   | 0.58                  | 24.07          |
|              | $\alpha 2$      | 2.07                   | 0.58                  | 25.12          |
|              | $\alpha 3$      | 2.18                   | 1.17                  | 47.61          |
| <b>APOA4</b> | $\alpha 3$      | 3.84                   | 0.13                  | 2.94           |
|              | pre $\beta$     | 2.67                   | 1.31                  | 43.72          |

**Supplementary Table 3. Kinetic parameters of HDL apolipoproteins.** Parameters estimates were made using the SAAM II software. FCR, fractional catabolic rate. PR, production rate. PS, pool size. 250 (A), 225 (B), 243 (C) and 243 with apoB depletion (D). -, size fractions that were not modeled for one participant but were modeled for the others.

**C****243**

|              | <u>HDL Size</u> | <u>FCR (pools/day)</u> | <u>PR (mg/kg/day)</u> | <u>PS (mg)</u> |
|--------------|-----------------|------------------------|-----------------------|----------------|
| <b>APOE</b>  | $\alpha 0$      | 4.10                   | 6.34                  | 140.59         |
|              | $\alpha 1$      | 2.71                   | 8.45                  | 283.59         |
|              | $\alpha 2$      | 1.86                   | 6.67                  | 325.63         |
|              | $\alpha 3$      | 3.82                   | 4.47                  | 106.44         |
| <b>APOM</b>  | $\alpha 1$      | 0.55                   | 0.48                  | 78.43          |
|              | $\alpha 2$      | 0.52                   | 0.63                  | 110.29         |
| <b>APOA1</b> | $\alpha 0$      | 0.46                   | 0.05                  | 9.41           |
|              | $\alpha 1$      | 0.86                   | 4.41                  | 468.87         |
|              | $\alpha 2$      | 0.85                   | 14.09                 | 1512.52        |
|              | $\alpha 3$      | 0.60                   | 8.94                  | 1351.94        |
|              | pre $\beta$     | 6.87                   | 2.55                  | 33.74          |
| <b>APOA2</b> | $\alpha 1$      | 0.57                   | 0.36                  | 57.08          |
|              | $\alpha 2$      | -                      | -                     | -              |
|              | $\alpha 3$      | 0.49                   | 1.59                  | 294.76         |
| <b>APOC3</b> | $\alpha 1$      | 1.42                   | 0.45                  | 29.06          |
|              | $\alpha 2$      | 1.54                   | 0.45                  | 26.90          |
|              | $\alpha 3$      | 1.34                   | 3.78                  | 256.19         |
| <b>APOA4</b> | $\alpha 3$      | 3.17                   | 0.04                  | 1.10           |
|              | pre $\beta$     | 3.60                   | 0.89                  | 22.55          |

**D****243-apoB**

|              | <u>HDL Size</u> | <u>FCR (pools/day)</u> | <u>PR (mg/kg/day)</u> | <u>PS (mg)</u> |
|--------------|-----------------|------------------------|-----------------------|----------------|
| <b>APOE</b>  | $\alpha 0$      | 2.37                   | 3.12                  | 119.81         |
|              | $\alpha 1$      | 2.36                   | 3.58                  | 138.20         |
|              | $\alpha 2$      | 2.50                   | 4.69                  | 170.86         |
|              | $\alpha 3$      | 3.02                   | 2.03                  | 61.16          |
| <b>APOM</b>  | $\alpha 1$      | 0.70                   | 0.62                  | 79.79          |
|              | $\alpha 2$      | 0.71                   | 1.44                  | 183.96         |
| <b>APOA1</b> | $\alpha 0$      | 0.46                   | 0.17                  | 34.59          |
|              | $\alpha 1$      | 0.60                   | 1.08                  | 164.57         |
|              | $\alpha 2$      | 0.75                   | 10.94                 | 1335.79        |
|              | $\alpha 3$      | 0.65                   | 14.68                 | 2051.23        |
|              | pre $\beta$     | 5.72                   | 3.14                  | 50.02          |
| <b>APOA2</b> | $\alpha 1$      | -                      | -                     | -              |
|              | $\alpha 2$      | 0.96                   | 2.66                  | 250.73         |
|              | $\alpha 3$      | 0.80                   | 1.30                  | 147.85         |
| <b>APOC3</b> | $\alpha 1$      | -                      | -                     | -              |
|              | $\alpha 2$      | 0.24                   | 0.34                  | 111.94         |
|              | $\alpha 3$      | 0.96                   | 1.18                  | 129.85         |
| <b>APOA4</b> | $\alpha 3$      | 2.07                   | 0.09                  | 4.10           |
|              | pre $\beta$     | 2.16                   | 1.24                  | 52.35          |
